# Supplementary material
Source: Springer Nature journal article supplement (https://www.springermedizin.de/resource/supplementary/12960_2013_400_MOESM1_ESM.pdf/9570010)
Supplement: MOESM1 [file 9570010]

4176 of records identified through database searching

2743 records after duplicates removed & screened for relevance to topic†

1433 duplicate records removed

1953 records excluded for lack of relevance†

### Databases searched

Web of Science  
OvidSP – Medline and Cochrane

EBSCO Host - CINAHL Plus with Full Text, Health Source - Consumer Edition, Health Source: Nursing/Academic Edition

BioMed Central Human Resources for Health, BMC Medical Research Methodology, BMC Health Services Research, BMC Nursing

790 abstracts assessed and examined by research team for inclusion

744 records excluded

46 full text articles assessed for eligibility

3 full text articles excluded

#### Reasons:

- Not specific to rural or remote health practitioners/ services

43 studies included
